# Supplementary material for: Molecular Analytical Assessment of Thermally Precipitated α-Lactalbumin after Resolubilization
Source: MDPI journal article supplement (doi:10.3390/foods10092231), 2021-09-20
Supplement: s1 [file s1]

**Table S1.** Assignment of secondary structural motifs to the peak positions obtained from FTIR spectrum analysis.

| Peak Position [ $\text{cm}^{-1}$ ] | Secondary Structure |
|------------------------------------|---------------------|
| 1693                               | $\beta$ -sheet      |
| 1680                               | $\beta$ -turn       |
| 1666                               | $\alpha$ -helix     |
| 1658                               | $\alpha$ -helix     |
| 1650                               | $\alpha$ -helix     |
| 1643                               | unordered           |
| 1632                               | $\alpha$ -helix     |
| 1620                               | $\beta$ -sheet      |
| 1612                               | $\beta$ -sheet      |
